# Supplementary material for: Mycobacteriophage–antibiotic therapy promotes enhanced clearance of drug-resistant Mycobacterium abscessus
Source: Oxford University Press journal article supplement (doi:10.1242/dmm.049159), 2021-09-01
Supplement: dmm049159supp.pdf [file dmm049159supp.pdf]

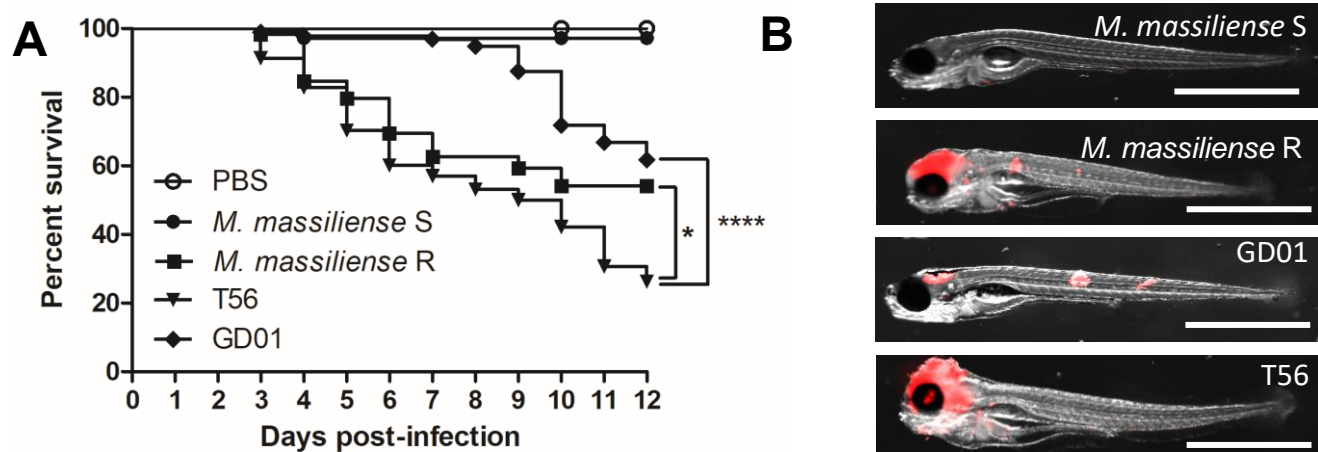

**Fig. S1. Comparative virulence of various *M. massiliense* strains in zebrafish embryos.** (A) Zebrafish embryos at 30 hpf were infected *via* caudal vein injection with approximately 200-250 CFU of each corresponding strain. Embryonic survival was monitored daily over a 12-day period. Represented data is the merged of 4 independent experiments, with approximately 20 embryos per group. \*  $P < 0.05$ , \*\*\*\*  $P < 0.001$ . (B) Representative images taken at 5 dpi, highlighting the heterogeneity in disease phenotypes between the different isolates. Scale bars represent 1 mm. Red areas highlight the bacterial localisation using fluorescence microscopy. Data shown is the merge of three independent experiments ( $n=30/\text{group}$  for each replicate).

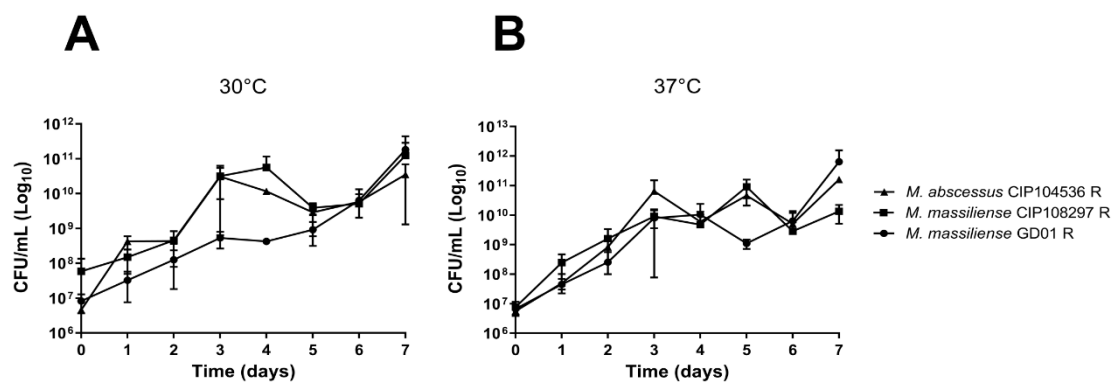

**Fig. S2. Growth curves of rough strains carrying pTEC27 at 30°C and 37°C.** *M. abscessus* CIP104536<sup>T</sup>, *M. massiliense* CIP108297 and GD01 were grown for 7 days in Middlebrook 7H9 supplemented with OADC, 0.025% tyloxapol and 500 µg/ml hygromycin. CFU counts determined by plating serial dilutions onto in Middlebrook 7H10 and enumeration of the colonies after 4 days of incubation at 30°C (**A**) or 37°C (**B**). Data shown is the mean ± standard deviation of two independent experiments run in triplicate.

**A**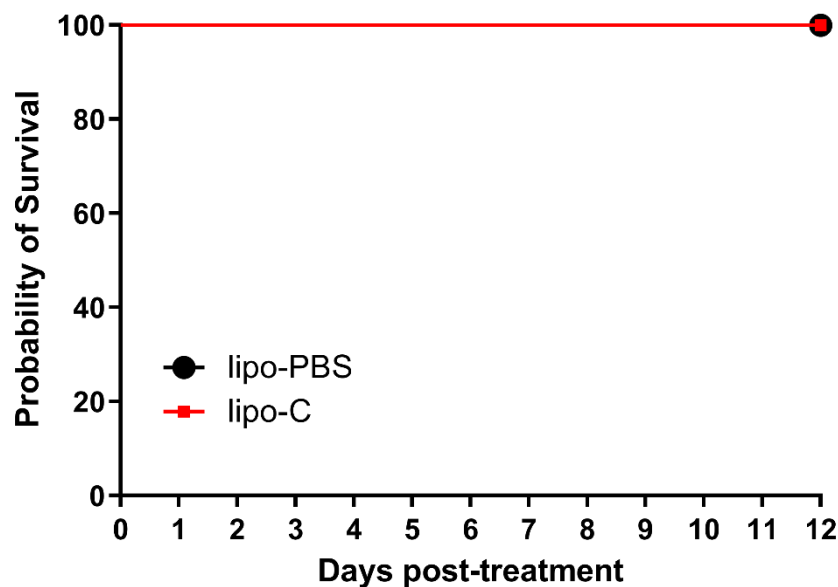**B**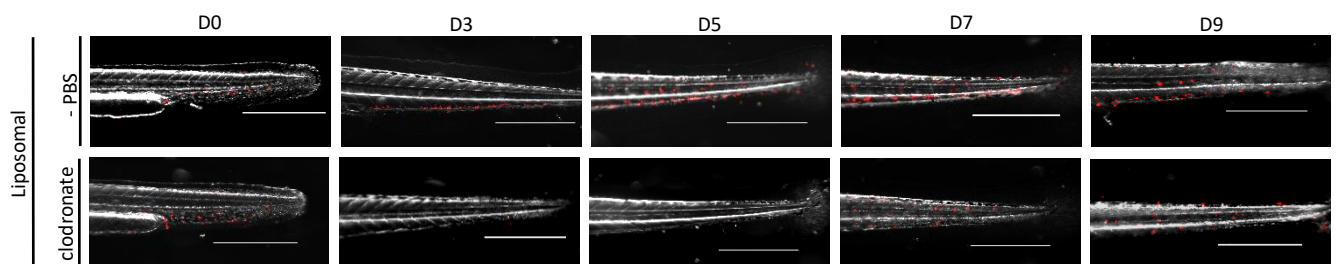

**Fig. S3. Impact of liposomal-clodronate on zebrafish survival and macrophage depletion.** *Tg(mpeg1:mCherry)* embryos harbouring red fluorescent macrophages were injected with 3 nL of either liposomal-PBS (lipo-PBS) or liposomal-clodronate (lipo-C) in the caudal vein at 24 hpf. **(A)** Embryo survival was monitored daily over a 12 day period (n=30/group). **(B)** Representative images of zebrafish tails showing transient macrophage depletion with lipo-clodronate. Macrophages are labelled in red. Scale bars represent 500 µm.

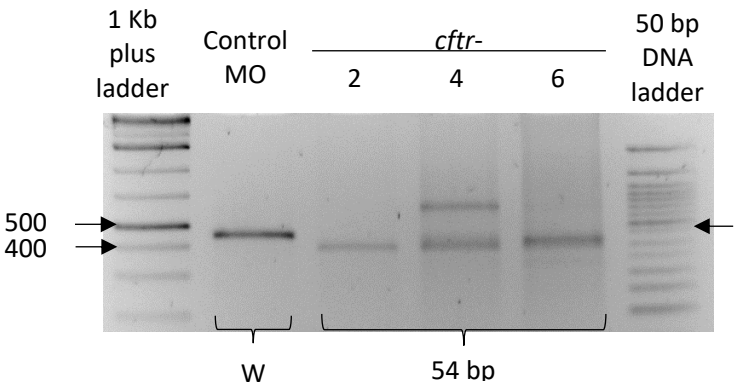

**Fig. S4. Targeted knockdown of *cftr* using splicing morpholino in embryos.** *cftr* specific products were amplified from RNA isolated from whole embryos at 2, 4 and 6 dpf. The *cftr*-MO blocks normal splicing resulting a deletion in exon 3, resulting in a 54 bp deletion in exon 3, and leading to the knockdown of CFTR expression (Bernut et al., 2019; Johansen and Kremer, 2020a).

**Table S1.** Drug susceptibility/resistance profile of *M. massiliense* GD01. Rough *M. abscessus* CIP104536<sup>T</sup> and *M. massiliense* CIP108297<sup>T</sup> were included for comparison. MIC (µg/mL) were determined after 4 days of incubation, following the CLSI guidelines.

| Strain<br>(morphotype)    | MIC (µg/mL) |     |                  |     |     |      |     |      |      |       |     |       |       |       |            |
|---------------------------|-------------|-----|------------------|-----|-----|------|-----|------|------|-------|-----|-------|-------|-------|------------|
|                           | IPM         | CFX | CLR <sup>1</sup> | TGC | CFZ | AMK  | CIP | ZEO  | KAN  | BDQ   | LNZ | GEN   | RFB   | Cpd12 | EJMCh-6    |
| <i>M. abscessus</i> (R)   | 16          | 64  | 4                | 1   | 1   | 64   | 128 | 32   | 16   | 0.03  | 64  | 64    | 12.5  | 0.06  | 0.125      |
| <i>M. massiliense</i> (R) | 32          | 64  | 0.5              | 2   | 0.5 | 32   | 64  | >128 | 16   | 0.06  | 64  | 64    | 25    | 0.06  | 0.125      |
| GD01 (R)                  | 32          | 64  | >128             | 2   | 0.5 | >128 | 64  | >128 | >128 | 0.015 | 64  | > 128 | 25-50 | 0.25  | 0.125-0.25 |

IPM, imipenem; CFX, ceftazidime; CLR<sup>1</sup>, clarithromycin; TGC, tigecycline; CFZ, clofazimine; AMK, amikacin; CIP, ciprofloxacin; ZEO, zeocin; KAN, kanamycin; BDQ, bedaquiline; LNZ, linezolid; GEN, gentamycin; RFB, rifabutin; Cpd12, indole-2 carboxamide; EJMCh-6, benzimidazole.
